# Supplementary material for: Rapid detection of Cu2+ by a paper-based microfluidic device coated with bovine serum albumin (BSA)–Au nanoclusters
Source: Royal Society of Chemistry journal article supplement (doi:10.1039/c5an01016k), 2015-01-01
Supplement: c5an01016k1.pdf [file c5an01016k1.pdf]

## Synthesis and characterizations of Au-BSA NCs.

Aqueous HAuCl<sub>4</sub> (5 mL, 10 mmol/L) was vigorously mixed with BSA (5 mL, 50 mg/mL) at 37 °C. After 2 min, aqueous NaOH (0.5 mL, 1.0 M,) was added, and the mixture was incubated at 37 °C for 12 h. All glassware was washed with aqua regia (HCl:HNO<sub>3</sub>, 3:1 v/v), and then rinsed with ultrapure water and ethanol. (Red emission with  $\lambda_{em\ max}$  650 nm, QY  $\approx$  6%, Au NCs consisted of  $\sim$ 25 gold atoms, with nanoparticle  $\sim$ 0.8 nm encapsulated in the BSA molecule)

The characterizations of Au-BSA NCs (TEM, Zeta potential and Fluorescence emission and excitation spectra) were shown in the following figures.

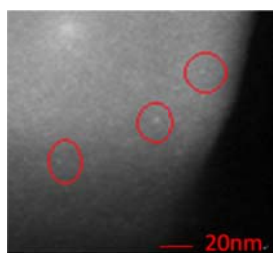

TEM of the Au-BSA NCs

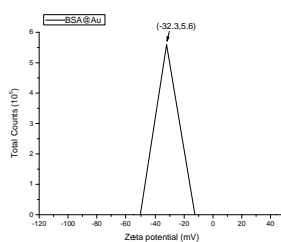

Zeta potential of the Au-BSA NCs

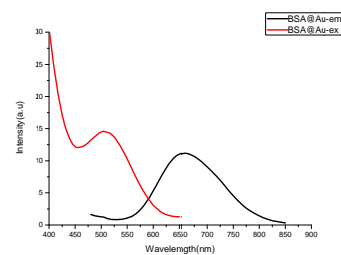

Fluorescence emission and excitation spectra
